# See and Hear What the Field Is Discussing!

*Psychiatric Services* features research related to the delivery of mental health services, especially for people with serious mental illness in community-based treatment programs. Provision of high-quality care involves collaboration among a variety of professionals. Clinicians, administrators, and policy makers look to *Psychiatric Services* for research on how to deliver evidence-based treatments, to take an integrated “whole-health” approach to care, and to better engage individuals in their care. Mental health’s current focus on patient-centered, recovery-oriented care and on dissemination of evidence-based practices is transforming service delivery systems at all levels. Research published in *Psychiatric Services* contributes to this transformation.

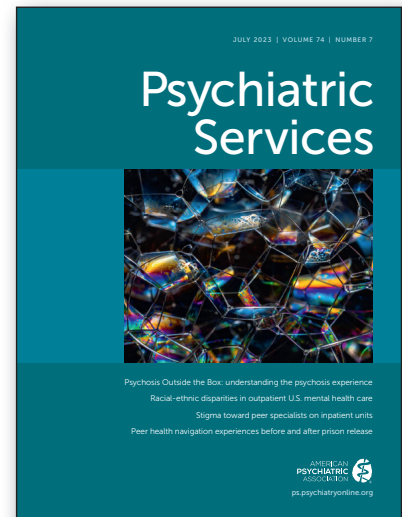

## Our Most Talked About Articles in 2023:

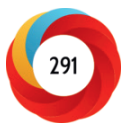

### Established Outpatient Care and Follow-Up After Acute Psychiatric Service Use Among Youths and Young Adults

January issue

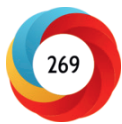

### Mental Health Emergency Hotlines in the United States: A Scoping Review (2012–2021)

May issue

## The Discussion Continues: *Psychiatric Services*’ Podcast “From Pages to Practice”

Editor Lisa Dixon, M.D., M.P.H., and Podcast Editor and co-host Josh Berezin, M.D., M.S., discuss the latest mental health services research published in *Psychiatric Services* and why it is relevant. Topics include community-based treatment programs, collaborative care, evidence-based treatment and service delivery, criminal and social justice, policy analysis, and more.

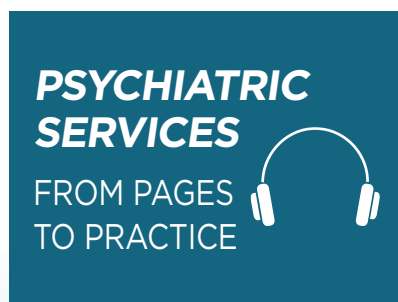

### Guidance for Handling the Increasing Prevalence of Drugs Adulterated or Laced With Fentanyl

Joseph Parks, M.D., discusses guidelines for clinicians in how to deal with the increased prevalence of drugs adulterated with fentanyl and similar potent fentanyl analogs.

### Psychiatrist and Nonpsychiatrist Physician Network Breadth in Dual Eligible Special Needs Plans

Eric P. Slade, Ph.D., discusses the complex and often confusing world of dual eligibility for Medicare and Medicaid coverage when it comes to mental health services, in particular Dual Eligible Special Needs Plans (D-SNPs), a type of Medicare Advantage plan designed around those eligible for both programs.

# Bringing Psychiatrists & Mental Health Professionals Together to Connect, Collaborate & Influence Systems-level change.

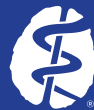

AMERICAN  
PSYCHIATRIC  
ASSOCIATION

THE  
MENTAL  
HEALTH  
SERVICES  
CONFERENCE

Oct. 12-14, 2023  
Washington, D.C.

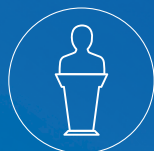

40+  
Sessions

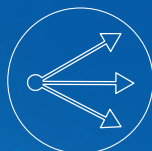

50+  
Topics

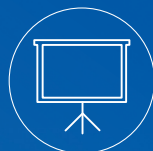

Poster Hall &  
Exhibit Gallery

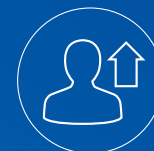

Up to  
17.5 CME\*

The 2023 Mental Health Services Conference will bring psychiatrists and mental health professionals together to collaborate on practical advice to influence systems-level change for their patients. Held in-person in Washington, D.C. at the Capital Hilton Hotel, join us October 12 through 14 as we work together to develop interdisciplinary practical solutions to solve real-world issues.

Not only will you network with psychiatrists looking to encourage change, but the Mental Health Services Conference will be attended by professionals throughout the mental health care field including primary care physicians, nurse practitioners, social workers, and more.

Join us in person to:

- Recognize and improve mental health disparities in the community
- Provide culturally competent care for diverse populations
- Identify barriers to care, including health service delivery issues
- Practical Psychopharmacology and Addictions updates
- Leadership Track
- Training in behavioral management and de-escalation
- Media Training
- And much, much more

Register today at  
[psychiatry.org/MHSC](https://psychiatry.org/MHSC)

## Subscription and Business Information

*The American Journal of Psychiatry*, ISSN 0002-953X, is published monthly by the American Psychiatric Association.

The American Psychiatric Association does not hold itself responsible for statements made in its publications by contributors or advertisers. Unless so stated, material in *The American Journal of Psychiatry* does not reflect the endorsement, official attitude, or position of the American Psychiatric Association or of the Journal's Editorial Board.

Periodicals postage paid at Washington, DC, and additional mailing offices. POSTMASTER: Send address changes to *The American Journal of Psychiatry*, Circulation Department, American Psychiatric Association, 800 Maine Avenue, S.W., Suite 900, Washington, D.C. 20024.

### Editorial Office

*American Journal of Psychiatry*  
American Psychiatric Association  
800 Maine Avenue, S.W., Suite 900  
Washington, D.C. 20024  
E-mail: [ajp@psych.org](mailto:ajp@psych.org)

### Customer Service

Phone: (800) 368-5777 (toll-free)  
E-mail: [appi@psych.org](mailto:appi@psych.org)

### APA Member Subscription Services

Phone: (888) 35-PSYCH (toll-free)

### Subscriptions

Regular and resident-fellow members in the U.S. receive print and online access as a **member benefit**. Subscriptions for non-members start at \$378 per year. Online only subscriptions start at \$342 per year. Go to <https://www.appi.org/ajp> for more information.

Institutional subscriptions are tier priced. For institutional site license or pricing information, contact (202) 559-3729 or [institutions@psych.org](mailto:institutions@psych.org).

*Additional subscription options, including single issues and student rates*  
Contact Customer Service

### Advertising

*Pharmaceutical Print and Online Advertising*  
Frank Cox, Kathleen Harrison, Tim Wolfinger  
Pharmaceutical Media, Inc.  
30 East 33rd Street  
New York, NY 10016  
Phone: (212) 904-0379  
E-mail: [twolfinger@pminy.com](mailto:twolfinger@pminy.com)

*Nonpharmaceutical and Online Sales*  
Eamon Wood  
Pharmaceutical Media, Inc.  
E-mail: [ewood@pminy.com](mailto:ewood@pminy.com)  
(see address and phone above).

### Permissions and Reprints

Material published in the journals of the American Psychiatric Association and American Psychiatric Association Publishing is protected by copyright and all rights are reserved. Material may not be reproduced in any form or by any means without written permission from the copyright owner. For permission to reproduce material published by APA, please visit <http://www.appi.org/customer-service/permissions> for more information. Permission can also be secured through the Copyright Clearance Center ([www.copyright.com](http://www.copyright.com)).

APA does not require that permission be obtained for the photocopying of isolated articles for nonprofit classroom or library reserve use; all fees associated with such permission are waived. This consent does not extend to other kinds of copying, such as copying for general distribution, for advertising or promotional purposes, for creating new collective works, or for resale. Requests for commercial distribution and bulk reprints should be directed to (202) 609-7075.

Indexed in Abstracts for Social Workers, Academic Abstracts, Biological Abstracts, Chemical Abstracts, Chicago Psychoanalytic Literature Index, Cumulative Index to Nursing Literature, Excerpta Medica, Hospital Literature Index, Index Medicus, International Nursing Index, Nutrition Abstracts, Psychological Abstracts, Science Citation Index, Social Science Source, and Social Sciences Index.

Pages are produced by TNQ Technologies (Chennai, India) effective with Volume 179, Number 3, March 2022, and printed by Sheridan NH (Hanover, NH) on acid-free paper effective with Volume 169, Number 1, January 2012.

© 2023 American Psychiatric Association.

# Telepsychiatry is transforming mental healthcare; but with new technology comes new risks.

With data breaches and cyber attacks becoming increasingly common, having the right cyber protection in place is critical. Whether you are in private practice or work within an organization, psychiatrists who maintain confidential patient / employee information have a responsibility to safeguard that data.

**Cyber Suite** through American Professional Agency, Inc., is an endorsement to your professional liability coverage.

It's simple to add with no lengthy forms to fill out.

American Psychiatric Association Endorsed  
Professional Liability Insurance Program



Adding the Cyber Suite endorsement is fast and easy.

Learn more about Cyber Suite at [AmericanProfessional.com/cyber-suite-PRO](http://AmericanProfessional.com/cyber-suite-PRO) or call (800) 421-6694 Ext. 2318.

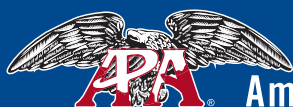

**American Professional Agency**

LEADERS IN PSYCHIATRIC MEDICAL LIABILITY INSURANCE

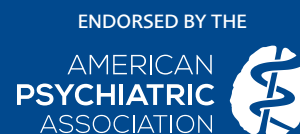

Source: http://ajp.psychiatryonline.org/doi/suppl/10.1176/ajp.2023.180.issue-9/suppl_file/back.pdf
