# The American Journal of Psychiatry

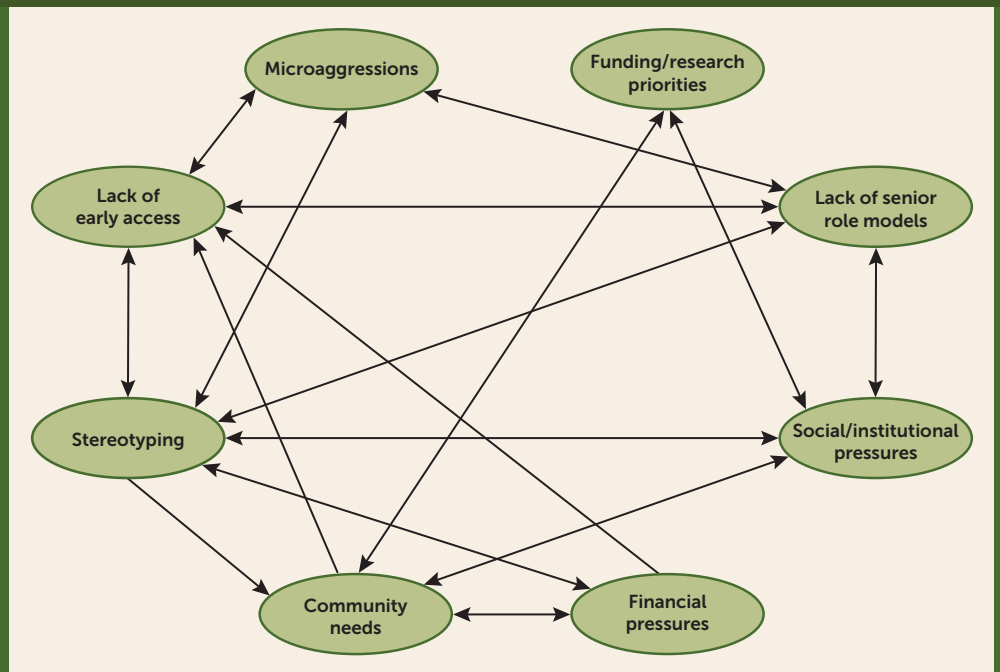

Structural Racism in Psychiatric Research Careers:  
Eradicating Barriers to a More Diverse Workforce

Disparities in Suicide-Related Behaviors Across  
Sexual Orientations by Gender

Zuranolone for the Treatment of Postpartum  
Depression

Subcortical Brain Alterations in Carriers of  
Genomic Copy Number Variants
